# Supplementary material for: Risks of alcohol and drug use disorders in prostate cancer survivors: a national cohort study
Source: PubMed Central journal article supplement (PMC10393870; doi:10.1093/jncics/pkad046), 2023-06-30
Supplement: pkad046_supplementary_data.pdf [file pkad046_supplementary_data.pdf]

## SUPPLEMENTARY MATERIAL

### Contents

**Supplementary Methods.** Ascertainment of AUD, DUD, and psychiatric disorders.

**Supplementary Table 1.** Associations between high-risk PC (1998-2017), stratified by locally advanced, very advanced, or distant metastases, and risk of AUD through 2018, Sweden.

**Supplementary Table 2.** Associations between PC diagnosis (1998-2017) and risk of AUD through 2018, after excluding men with any diagnosis of AUD before index date.

**Supplementary Table 3.** Associations between high-risk PC (1998-2017), stratified by locally advanced, very advanced, or distant metastases, and risk of DUD through 2018, Sweden.

**Supplementary Table 4.** Associations between PC diagnosis (1998-2017) and risk of DUD through 2018, after excluding men with any diagnosis of DUD before index date.

**Supplementary Table 5.** Associations between PC diagnosis (1998-2017) and risk of opioid use disorder through 2018, Sweden.

**Supplementary Table 6.** Associations between PC diagnosis (1998-2017) and risk of sedative/hypnotic use disorder through 2018, Sweden.

**Supplementary Table 7.** Associations between PC diagnosis (1998-2017) and risk of AUD through 2018, stratified by age at index date.

**Supplementary Table 8.** Associations between PC diagnosis (1998-2017) and risk of DUD through 2018, stratified by age at index date.

**Supplementary Table 9.** Associations between high-risk PC (1998-2017), stratified by year of diagnosis, and risk of AUD or DUD within the next 2 years.

## **Supplementary Methods. Ascertainment of AUD, DUD, and psychiatric disorders.**

Substance use and psychiatric disorders were identified using the following ICD codes:

### **Alcohol Use Disorder (AUD)**

ICD-8: 291, 303, 357F (357.5), 425F (425.5), 535D (535.3), 571A-D (571.0-571.3), 980, V79B (V79.1)

ICD-9: 291, 303, 305A (305.0), 357F (357.5), 425F (425.5), 535D (535.3), 571A-D (571.0-571.3), 980, V79B (V79.1)

ICD-10: F10 (excluding F10.0), Z50.2, Z71.4, E24.4, G31.2, G62.1, G72.1, I42.6, K29.2, K70.0-K70.9, K85.2, K86.0, O35.4, T51.0-T51.9

AUD was further identified from the Suspicion and Crime Registers for individuals who had at least two convictions of drunk driving (law 1951:649) or drunk in charge of maritime vessel (law 1994:1009), and from the Prescribed Drug Register for those with a prescription for disulfiram (N07BB01), acamprosate (N07BB03), or naltrexone (N07BB04).

### **Drug Use Disorders (DUD)**

ICD-8: 304

ICD-9: 292, 304, 305 (excluding 305.0 and 305.1)

ICD-10: F10-F19 (excluding F10 and F17)

DUD was further identified from the Suspicion Register by codes 3070, 5010, 5011, and 5012; from the Crime Register by references to laws covering narcotics (law 1968:64, paragraph 1, point 6) and drug-related driving offences (law 1951:649, paragraph 4, Subsection 2 and paragraph 4A, Subsection 2).

### **Psychiatric Disorders (modeled as covariates)**

Major depression (ICD-10: F32-F33)

Anxiety disorders (ICD-10: F40-F42)

Bipolar disorder (ICD-10: F31)

Schizophrenia (ICD-10 F20)

**Supplementary Table 1.** Associations between high-risk PC (1998-2017), stratified by locally advanced, very advanced, or distant metastases, and risk of AUD through 2018, Sweden.

| Time after PC diagnosis                | AUD, n   |          | Reduced model <sup>a</sup> | Full model <sup>b</sup> |          |
|----------------------------------------|----------|----------|----------------------------|-------------------------|----------|
|                                        | PC cases | Controls | HR (95% CI)                | HR (95% CI)             | <i>P</i> |
| <b>High-risk PC/locally advanced</b>   |          |          |                            |                         |          |
| Entire follow-up period                | 1,193    | 15,367   | 1.40 (1.29, 1.51)          | 1.42 (1.29, 1.57)       | <0.001   |
| <3 months                              | 793      | 9,228    | 1.43 (1.29, 1.58)          | 1.45 (1.28, 1.64)       | <0.001   |
| 3 to <12 months                        | 146      | 1,725    | 1.64 (1.30, 2.08)          | 1.73 (1.29, 2.32)       | <0.001   |
| 1 to <2 years                          | 79       | 1,342    | 1.23 (0.91, 1.64)          | 1.14 (0.80, 1.61)       | 0.46     |
| 2 to <5 years                          | 126      | 2,056    | 1.21 (0.96, 1.54)          | 1.30 (1.00, 1.70)       | 0.05     |
| 5 to <10 years                         | 49       | 950      | 1.33 (0.86, 2.06)          | 1.26 (0.78, 2.04)       | 0.34     |
| ≥10 years                              | 0        | 66       | --                         | --                      | --       |
| <b>High-risk PC/very advanced</b>      |          |          |                            |                         |          |
| Entire follow-up period                | 301      | 4,225    | 1.63 (1.39, 1.91)          | 1.45 (1.19, 1.76)       | <0.001   |
| <3 months                              | 214      | 2,593    | 1.90 (1.56, 2.31)          | 1.63 (1.27, 2.10)       | <0.001   |
| 3 to <12 months                        | 28       | 501      | 1.30 (0.82, 2.07)          | 1.23 (0.71, 2.14)       | 0.47     |
| 1 to <2 years                          | 20       | 372      | 1.30 (0.75, 2.27)          | 0.94 (0.48, 1.87)       | 0.87     |
| 2 to <5 years                          | 28       | 528      | 1.06 (0.64, 1.76)          | 1.14 (0.65, 1.97)       | 0.65     |
| 5 to <10 years                         | 11       | 217      | 1.73 (0.71, 4.17)          | 2.17 (0.82, 5.76)       | 0.12     |
| ≥10 years                              | 0        | 14       | --                         | --                      | --       |
| <b>High-risk PC/distant metastases</b> |          |          |                            |                         |          |
| Entire follow-up period                | 210      | 3,322    | 1.55 (1.29, 1.87)          | 1.58 (1.26, 1.97)       | <0.001   |
| <3 months                              | 145      | 2,136    | 1.70 (1.35, 2.14)          | 1.78 (1.33, 2.37)       | <0.001   |
| 3 to <12 months                        | 25       | 435      | 1.50 (0.90, 2.50)          | 1.83 (1.00, 3.35)       | 0.05     |
| 1 to <2 years                          | 13       | 288      | 0.98 (0.53, 1.83)          | 1.06 (0.55, 2.06)       | 0.86     |
| 2 to <5 years                          | 22       | 352      | 1.56 (0.88, 2.74)          | 1.29 (0.68, 2.45)       | 0.44     |
| 5 to <10 years                         | 5        | 109      | 1.22 (0.36, 4.16)          | 1.29 (0.32, 5.17)       | 0.72     |
| ≥10 years                              | 0        | 2        | --                         | --                      | --       |

<sup>a</sup>Adjusted for age, birth country, marital status, education, income, and region.

<sup>b</sup>Additionally adjusted for prior history of psychiatric disorders (major depression, anxiety disorder, bipolar disorder, schizophrenia, AUD, DUD) at index date.

AUD = alcohol use disorder, CI = confidence interval, DUD = drug use disorders, HR = hazard ratio, PC = prostate cancer

**Supplementary Table 2.** Associations between PC diagnosis (1998-2017) and risk of AUD through 2018, after excluding men with any diagnosis of AUD before index date.

| Time after PC diagnosis                                     | AUD, n   |          | Adjusted HR<br>(95% CI) <sup>a</sup> | P      |
|-------------------------------------------------------------|----------|----------|--------------------------------------|--------|
|                                                             | PC cases | Controls |                                      |        |
| <b>High-risk PC</b>                                         |          |          |                                      |        |
| Entire follow-up period                                     | 865      | 12,365   | 1.21 (1.10, 1.33)                    | <0.001 |
| <3 months                                                   | 505      | 6,264    | 1.38 (1.21, 1.56)                    | <0.001 |
| 3 to <12 months                                             | 108      | 1,559    | 1.40 (1.07, 1.84)                    | 0.01   |
| 1 to <2 years                                               | 61       | 1,341    | 0.77 (0.56, 1.05)                    | 0.09   |
| 2 to <5 years                                               | 133      | 2,121    | 0.99 (0.79, 1.24)                    | 0.93   |
| 5 to <10 years                                              | 58       | 1,018    | 1.18 (0.80, 1.74)                    | 0.41   |
| ≥10 years                                                   | 0        | 62       | --                                   | --     |
| <b>High-risk PC (2005-2017)<sup>b</sup></b>                 |          |          |                                      |        |
| ADT only                                                    | 209      | --       | 1.70 (1.38, 2.09)                    | <0.001 |
| Radiation                                                   | 175      | --       | 1.22 (0.99, 1.51)                    | 0.06   |
| Radical prostatectomy                                       | 26       | --       | 2.28 (1.28, 4.06)                    | 0.005  |
| Radical prostatectomy and radiation                         | 21       | --       | 1.14 (0.62, 2.08)                    | 0.68   |
| <b>Low- or intermediate-risk PC</b>                         |          |          |                                      |        |
| Entire follow-up period                                     | 2,096    | 24,618   | 1.13 (1.06, 1.20)                    | <0.001 |
| <3 months                                                   | 1,303    | 11,876   | 1.30 (1.21, 1.41)                    | <0.001 |
| 3 to <12 months                                             | 290      | 3,225    | 1.16 (0.98, 1.38)                    | 0.08   |
| 1 to <2 years                                               | 163      | 2,604    | 0.85 (0.69, 1.05)                    | 0.14   |
| 2 to <5 years                                               | 265      | 4,512    | 0.78 (0.66, 0.92)                    | 0.004  |
| 5 to <10 years                                              | 75       | 2,173    | 0.73 (0.52, 1.02)                    | 0.06   |
| ≥10 years                                                   | 0        | 228      | --                                   | --     |
| <b>Low- or intermediate-risk PC (2005-2017)<sup>b</sup></b> |          |          |                                      |        |
| Deferred treatment                                          | 794      | --       | 1.25 (1.13, 1.38)                    | <0.001 |
| ADT only                                                    | 132      | --       | 1.49 (1.13, 1.95)                    | 0.005  |
| Radiation                                                   | 287      | --       | 1.57 (1.33, 1.86)                    | <0.001 |
| Radical prostatectomy                                       | 184      | --       | 1.48 (1.20, 1.82)                    | <0.001 |
| Radical prostatectomy and radiation                         | 45       | --       | 1.29 (0.86, 1.93)                    | 0.22   |

<sup>a</sup>Adjusted for age, birth country, marital status, education, income, region, and prior history of psychiatric disorders (major depression, anxiety disorder, bipolar disorder, schizophrenia, DUD) at index date.

AUD = alcohol use disorder, CI = confidence interval, DUD = drug use disorders, HR = hazard ratio, PC = prostate cancer

**Supplementary Table 3.** Associations between high-risk PC (1998-2017), stratified by locally advanced, very advanced, or distant metastases, and risk of DUD through 2018, Sweden.

| Time after PC diagnosis                | DUD, n   |          | Reduced model <sup>a</sup> | Full model <sup>b</sup> |        |
|----------------------------------------|----------|----------|----------------------------|-------------------------|--------|
|                                        | PC cases | Controls | HR (95% CI)                | HR (95% CI)             | P      |
| <b>High-risk PC/locally advanced</b>   |          |          |                            |                         |        |
| Entire follow-up period                | 267      | 2,114    | 1.66 (1.42, 1.94)          | 1.72 (1.45, 2.05)       | <0.001 |
| <3 months                              | 24       | 475      | 1.95 (1.10, 3.48)          | 4.09 (1.81, 9.27)       | 0.001  |
| 3 to <12 months                        | 28       | 277      | 1.32 (0.83, 2.10)          | 1.34 (0.75, 2.40)       | 0.33   |
| 1 to <2 years                          | 47       | 283      | 2.24 (1.53, 3.29)          | 2.22 (1.43, 3.45)       | <0.001 |
| 2 to <5 years                          | 72       | 529      | 1.59 (1.19, 2.13)          | 1.52 (1.11, 2.10)       | 0.01   |
| 5 to <10 years                         | 61       | 404      | 1.34 (0.97, 1.85)          | 1.43 (1.02, 2.00)       | 0.04   |
| ≥10 years                              | 35       | 146      | 2.10 (1.32, 3.34)          | 2.39 (1.48, 3.88)       | <0.001 |
| <b>High-risk PC/very advanced</b>      |          |          |                            |                         |        |
| Entire follow-up period                | 60       | 537      | 1.54 (1.11, 2.14)          | 1.63 (1.13, 2.35)       | 0.009  |
| <3 months                              | 6        | 146      | 1.44 (0.47, 4.39)          | 0.95 (0.19, 4.82)       | 0.95   |
| 3 to <12 months                        | 11       | 90       | 1.39 (0.66, 2.92)          | 1.47 (0.62, 3.47)       | 0.39   |
| 1 to <2 years                          | 10       | 69       | 1.07 (0.48, 2.38)          | 0.99 (0.41, 2.39)       | 0.99   |
| 2 to <5 years                          | 15       | 117      | 1.66 (0.87, 3.16)          | 1.83 (0.94, 3.58)       | 0.08   |
| 5 to <10 years                         | 16       | 86       | 3.05 (1.52, 6.13)          | 3.07 (1.44, 6.56)       | 0.004  |
| ≥10 years                              | 2        | 29       | 0.67 (0.14, 3.32)          | 1.06 (0.19, 5.85)       | 0.95   |
| <b>High-risk PC/distant metastases</b> |          |          |                            |                         |        |
| Entire follow-up period                | 77       | 372      | 3.09 (2.24, 4.27)          | 3.76 (2.63, 5.36)       | <0.001 |
| <3 months                              | 9        | 123      | 5.95 (2.17, 16.32)         | 8.06 (2.13, 30.42)      | 0.002  |
| 3 to <12 months                        | 16       | 61       | 2.63 (1.30, 5.31)          | 3.58 (1.59, 8.08)       | 0.002  |
| 1 to <2 years                          | 9        | 47       | 1.77 (0.71, 4.42)          | 1.83 (0.66, 5.04)       | 0.24   |
| 2 to <5 years                          | 22       | 90       | 3.31 (1.82, 6.02)          | 4.22 (2.23, 7.98)       | <0.001 |
| 5 to <10 years                         | 17       | 38       | 4.22 (2.00, 8.88)          | 5.30 (2.38, 11.81)      | <0.001 |
| ≥10 years                              | 4        | 13       | 1.49 (0.35, 6.41)          | 1.80 (0.41, 7.94)       | 0.44   |

<sup>a</sup>Adjusted for age, birth country, marital status, education, income, and region.

<sup>b</sup>Additionally adjusted for prior history of psychiatric disorders (major depression, anxiety disorder, bipolar disorder, schizophrenia, AUD, DUD) at index date.

AUD = alcohol use disorder, CI = confidence interval, DUD = drug use disorders, HR = hazard ratio, PC = prostate cancer

**Supplementary Table 4.** Associations between PC diagnosis (1998-2017) and risk of DUD through 2018, after excluding men with any diagnosis of DUD before index date.

| Time after PC diagnosis                                     | DUD, n   |          | Adjusted HR<br>(95% CI) <sup>a</sup> | P      |
|-------------------------------------------------------------|----------|----------|--------------------------------------|--------|
|                                                             | PC cases | Controls |                                      |        |
| <b>High-risk PC</b>                                         |          |          |                                      |        |
| Entire follow-up period                                     | 345      | 2,043    | 1.86 (1.60, 2.15)                    | <0.001 |
| <3 months                                                   | 20       | 168      | 3.86 (1.97, 7.57)                    | <0.001 |
| 3 to <12 months                                             | 43       | 276      | 1.39 (0.90, 2.15)                    | 0.14   |
| 1 to <2 years                                               | 51       | 319      | 1.95 (1.31, 2.90)                    | 0.001  |
| 2 to <5 years                                               | 100      | 628      | 1.80 (1.38, 2.36)                    | <0.001 |
| 5 to <10 years                                              | 90       | 478      | 1.80 (1.35, 2.40)                    | <0.001 |
| ≥10 years                                                   | 41       | 174      | 2.10 (1.36, 3.26)                    | 0.001  |
| <b>High-risk PC (2005-2017)<sup>b</sup></b>                 |          |          |                                      |        |
| ADT only                                                    | 112      | --       | 2.50 (1.89, 3.30)                    | <0.001 |
| Radiation                                                   | 59       | --       | 1.75 (1.22, 2.51)                    | 0.002  |
| Radical prostatectomy                                       | 6        | --       | 0.65 (0.20, 2.11)                    | 0.48   |
| Radical prostatectomy and radiation                         | 7        | --       | 0.70 (0.23, 2.15)                    | 0.54   |
| <b>Low- or intermediate-risk PC</b>                         |          |          |                                      |        |
| Entire follow-up period                                     | 474      | 4,325    | 1.04 (0.92, 1.17)                    | 0.56   |
| <3 months                                                   | 13       | 316      | 0.55 (0.25, 1.25)                    | 0.15   |
| 3 to <12 months                                             | 41       | 468      | 0.72 (0.47, 1.09)                    | 0.12   |
| 1 to <2 years                                               | 55       | 573      | 0.97 (0.68, 1.38)                    | 0.87   |
| 2 to <5 years                                               | 136      | 1,282    | 1.08 (0.87, 1.35)                    | 0.49   |
| 5 to <10 years                                              | 151      | 1,203    | 1.12 (0.90, 1.39)                    | 0.30   |
| ≥10 years                                                   | 78       | 483      | 1.15 (0.84, 1.58)                    | 0.38   |
| <b>Low- or intermediate-risk PC (2005-2017)<sup>b</sup></b> |          |          |                                      |        |
| Deferred treatment                                          | 169      | --       | 0.97 (0.80, 1.19)                    | 0.80   |
| ADT only                                                    | 48       | --       | 1.94 (1.25, 3.01)                    | 0.003  |
| Radiation                                                   | 49       | --       | 0.87 (0.60, 1.26)                    | 0.46   |
| Radical prostatectomy                                       | 35       | --       | 0.89 (0.58, 1.38)                    | 0.60   |
| Radical prostatectomy and radiation                         | 7        | --       | 1.35 (0.56, 3.22)                    | 0.51   |

<sup>a</sup>Adjusted for age, birth country, marital status, education, income, region, and prior history of psychiatric disorders (major depression, anxiety disorder, bipolar disorder, schizophrenia, AUD) at index date.

AUD = alcohol use disorder, CI = confidence interval, DUD = drug use disorders, HR = hazard ratio, PC = prostate cancer

**Supplementary Table 5.** Associations between PC diagnosis (1998-2017) and risk of opioid use disorder through 2018, Sweden.

| Time after PC diagnosis                                     | Opioid use disorder, n |          | Adjusted HR<br>(95% CI) <sup>a</sup> | P      |
|-------------------------------------------------------------|------------------------|----------|--------------------------------------|--------|
|                                                             | PC cases               | Controls |                                      |        |
| <b>High-risk PC</b>                                         |                        |          |                                      |        |
| Entire follow-up period                                     | 182                    | 1,515    | 1.69 (1.39, 2.06)                    | <0.001 |
| <3 months                                                   | 12                     | 198      | 1.16 (0.38, 3.48)                    | 0.80   |
| 3 to <12 months                                             | 23                     | 140      | 1.44 (0.81, 2.54)                    | 0.21   |
| 1 to <2 years                                               | 30                     | 151      | 1.27 (0.78, 2.06)                    | 0.34   |
| 2 to <5 years                                               | 47                     | 355      | 1.12 (0.78, 1.61)                    | 0.54   |
| 5 to <10 years                                              | 48                     | 412      | 2.03 (1.39, 2.97)                    | <0.001 |
| ≥10 years                                                   | 22                     | 259      | 3.07 (1.61, 5.84)                    | 0.001  |
| <b>High-risk PC (2005-2017)<sup>b</sup></b>                 |                        |          |                                      |        |
| ADT only                                                    | 65                     | --       | 2.22 (1.55, 3.17)                    | <0.001 |
| Radiation                                                   | 38                     | --       | 2.05 (1.25, 3.34)                    | 0.004  |
| <b>Low- or intermediate-risk PC</b>                         |                        |          |                                      |        |
| Entire follow-up period                                     | 198                    | 2,199    | 1.02 (0.84, 1.25)                    | 0.85   |
| <3 months                                                   | 11                     | 375      | 1.21 (0.37, 3.98)                    | 0.75   |
| 3 to <12 months                                             | 27                     | 253      | 0.75 (0.39, 1.46)                    | 0.40   |
| 1 to <2 years                                               | 20                     | 225      | 0.74 (0.40, 1.40)                    | 0.36   |
| 2 to <5 years                                               | 49                     | 498      | 0.85 (0.58, 1.23)                    | 0.38   |
| 5 to <10 years                                              | 51                     | 543      | 0.99 (0.69, 1.42)                    | 0.96   |
| ≥10 years                                                   | 30                     | 305      | 1.43 (0.88, 2.30)                    | 0.15   |
| <b>Low- or intermediate-risk PC (2005-2017)<sup>b</sup></b> |                        |          |                                      |        |
| Deferred treatment                                          | 67                     | --       | 0.89 (0.62, 1.27)                    | 0.52   |
| ADT only                                                    | 12                     | --       | 1.34 (0.61, 2.90)                    | 0.47   |
| Radiation                                                   | 21                     | --       | 0.65 (0.35, 1.24)                    | 0.19   |

<sup>a</sup>Adjusted for age, birth country, marital status, education, income, region, and prior history of psychiatric disorders (major depression, anxiety disorder, bipolar disorder, schizophrenia, AUD, DUD) at index date.

<sup>b</sup>Subanalysis based on treatment data available during 2005-2017.

ADT = androgen deprivation therapy, AUD = alcohol use disorder, CI = confidence interval, DUD = drug use disorders, HR = hazard ratio, PC = prostate cancer

**Supplementary Table 6.** Associations between PC diagnosis (1998-2017) and risk of sedative/hypnotic use disorder through 2018, Sweden.

| Time after PC diagnosis                                     | Sedative/hypnotic use disorder, n |          | Adjusted HR (95% CI) <sup>a</sup> | P     |
|-------------------------------------------------------------|-----------------------------------|----------|-----------------------------------|-------|
|                                                             | PC cases                          | Controls |                                   |       |
| <b>High-risk PC</b>                                         |                                   |          |                                   |       |
| Entire follow-up period                                     | 98                                | 1,183    | 1.20 (0.90, 1.59)                 | 0.21  |
| <3 months                                                   | 15                                | 198      | 3.19 (1.24, 8.22)                 | 0.02  |
| 3 to <12 months                                             | 9                                 | 117      | 0.47 (0.19, 1.19)                 | 0.11  |
| 1 to <2 years                                               | 14                                | 101      | 1.13 (0.54, 2.39)                 | 0.75  |
| 2 to <5 years                                               | 26                                | 287      | 1.20 (0.72, 2.00)                 | 0.48  |
| 5 to <10 years                                              | 27                                | 277      | 0.88 (0.51, 1.53)                 | 0.66  |
| ≥10 years                                                   | 7                                 | 203      | 0.85 (0.29, 2.45)                 | 0.76  |
| <b>High-risk PC (2005-2017)<sup>b</sup></b>                 |                                   |          |                                   |       |
| ADT only                                                    | 34                                | --       | 1.95 (1.14, 3.33)                 | 0.02  |
| Radiation                                                   | 13                                | --       | 0.56 (0.23, 1.36)                 | 0.20  |
| <b>Low- or intermediate-risk PC</b>                         |                                   |          |                                   |       |
| Entire follow-up period                                     | 187                               | 1,879    | 1.08 (0.85, 1.38)                 | 0.54  |
| <3 months                                                   | 14                                | 356      | 1.13 (0.26, 4.98)                 | 0.87  |
| 3 to <12 months                                             | 27                                | 207      | 0.41 (0.17, 1.01)                 | 0.05  |
| 1 to <2 years                                               | 27                                | 231      | 0.90 (0.43, 1.91)                 | 0.79  |
| 2 to <5 years                                               | 52                                | 420      | 1.25 (0.82, 1.92)                 | 0.30  |
| 5 to <10 years                                              | 49                                | 436      | 1.19 (0.77, 1.83)                 | 0.43  |
| ≥10 years                                                   | 18                                | 229      | 0.95 (0.45, 2.04)                 | 0.90  |
| <b>Low- or intermediate-risk PC (2005-2017)<sup>b</sup></b> |                                   |          |                                   |       |
| Deferred treatment                                          | 87                                | --       | 1.11 (0.72, 1.70)                 | 0.64  |
| ADT only                                                    | 17                                | --       | 3.43 (1.37, 8.56)                 | 0.008 |
| Radiation                                                   | 17                                | --       | 1.22 (0.56, 2.65)                 | 0.62  |

<sup>a</sup>Adjusted for age, birth country, marital status, education, income, region, and prior history of psychiatric disorders (major depression, anxiety disorder, bipolar disorder, schizophrenia, AUD, DUD) at index date.

<sup>b</sup>Subanalysis based on treatment data available during 2005-2017.

ADT = androgen deprivation therapy, AUD = alcohol use disorder, CI = confidence interval, DUD = drug use disorders, HR = hazard ratio, PC = prostate cancer



**Supplementary Table 7.** Associations between PC diagnosis (1998-2017) and risk of AUD through 2018, stratified by age at index date.

| Age at index date                   | AUD, n   |          | Reduced model <sup>a</sup> | Full model <sup>b</sup> |          |
|-------------------------------------|----------|----------|----------------------------|-------------------------|----------|
|                                     | PC cases | Controls | HR (95% CI)                | HR (95% CI)             | <i>P</i> |
| <b>High-risk PC</b>                 |          |          |                            |                         |          |
| <55 years                           | 40       | 394      | 1.80 (1.35, 2.41)          | 1.66 (1.18, 2.34)       | 0.004    |
| 55-64 years                         | 327      | 3,574    | 1.60 (1.42, 1.79)          | 1.53 (1.33, 1.75)       | <0.001   |
| 65-74 years                         | 544      | 7,452    | 1.39 (1.26, 1.54)          | 1.39 (1.22, 1.57)       | <0.001   |
| 75-84 years                         | 197      | 4,119    | 1.23 (1.03, 1.46)          | 1.31 (1.06, 1.64)       | 0.02     |
| ≥85 years                           | 20       | 546      | 1.23 (0.65, 2.34)          | 1.49 (0.69, 3.22)       | 0.31     |
| <b>Low- or intermediate-risk PC</b> |          |          |                            |                         |          |
| <55 years                           | 191      | 2,130    | 1.46 (1.27, 1.68)          | 1.67 (1.41, 1.98)       | <0.001   |
| 55-64 years                         | 1,080    | 12,753   | 1.25 (1.17, 1.34)          | 1.42 (1.31, 1.53)       | <0.001   |
| 65-74 years                         | 1,123    | 15,810   | 1.10 (1.02, 1.19)          | 1.28 (1.17, 1.41)       | <0.001   |
| 75-84 years                         | 153      | 2,939    | 1.01 (0.81, 1.25)          | 1.22 (0.93, 1.61)       | 0.16     |
| ≥85 years                           | 5        | 104      | 0.15 (0.02, 1.36)          | 0.23 (0.01, 3.59)       | 0.29     |

<sup>a</sup>Adjusted for age, birth country, marital status, education, income, and region.

<sup>b</sup>Additionally adjusted for prior history of psychiatric disorders (major depression, anxiety disorder, bipolar disorder, schizophrenia, AUD, DUD) at index date.

AUD = alcohol use disorder, CI = confidence interval, DUD = drug use disorders, HR = hazard ratio, PC = prostate cancer

**Supplementary Table 8.** Associations between PC diagnosis (1998-2017) and risk of DUD through 2018, stratified by age at index date.

| Age at index date                   | DUD, n   |          | Reduced model <sup>a</sup> | Full model <sup>b</sup> |          |
|-------------------------------------|----------|----------|----------------------------|-------------------------|----------|
|                                     | PC cases | Controls | HR (95% CI)                | HR (95% CI)             | <i>P</i> |
| <b>High-risk PC</b>                 |          |          |                            |                         |          |
| <55 years                           | 15       | 130      | 1.32 (0.80, 2.15)          | 1.09 (0.52, 2.25)       | 0.83     |
| 55-64 years                         | 74       | 550      | 1.61 (1.25, 2.07)          | 1.96 (1.45, 2.65)       | <0.001   |
| 65-74 years                         | 81       | 769      | 1.84 (1.48, 2.29)          | 2.25 (1.74, 2.91)       | <0.001   |
| 75-84 years                         | 73       | 593      | 1.78 (1.39, 2.29)          | 1.71 (1.31, 2.24)       | <0.001   |
| ≥85 years                           | 19       | 143      | 2.01 (1.12, 3.60)          | 1.98 (1.06, 3.71)       | 0.03     |
| <b>Low- or intermediate-risk PC</b> |          |          |                            |                         |          |
| <55 years                           | 53       | 770      | 0.97 (0.75, 1.27)          | 1.16 (0.83, 1.64)       | 0.38     |
| 55-64 years                         | 162      | 2,109    | 0.89 (0.76, 1.04)          | 1.02 (0.84, 1.25)       | 0.81     |
| 65-74 years                         | 163      | 1,807    | 1.16 (0.98, 1.38)          | 1.24 (1.01, 1.52)       | 0.04     |
| 75-84 years                         | 40       | 460      | 1.51 (1.09, 2.08)          | 1.69 (1.19, 2.41)       | 0.003    |
| ≥85 years                           | 9        | 36       | 2.81 (1.11, 7.12)          | 4.03 (1.50, 10.82)      | 0.006    |

<sup>a</sup>Adjusted for age, birth country, marital status, education, income, and region.

<sup>b</sup>Additionally adjusted for prior history of psychiatric disorders (major depression, anxiety disorder, bipolar disorder, schizophrenia, AUD, DUD) at index date.

AUD = alcohol use disorder, CI = confidence interval, DUD = drug use disorders, HR = hazard ratio, PC = prostate cancer

**Supplementary Table 9.** Associations between high-risk PC (1998-2017), stratified by year of diagnosis, and risk of AUD or DUD within the next 2 years.

| Calendar year of PC diagnosis | No. with outcome |          | Reduced model <sup>a</sup> | Full model <sup>b</sup> |          |
|-------------------------------|------------------|----------|----------------------------|-------------------------|----------|
|                               | PC cases         | Controls | HR (95% CI)                | HR (95% CI)             | <i>P</i> |
| <b>AUD</b>                    |                  |          |                            |                         |          |
| 1998-2004                     | 276              | 2,962    | 1.20 (1.03, 1.40)          | 1.13 (0.93, 1.36)       | 0.21     |
| 2005-2009                     | 486              | 5,987    | 1.75 (1.53, 1.99)          | 1.81 (1.55, 2.11)       | <0.001   |
| 2010-2017                     | 701              | 9,671    | 1.56 (1.40, 1.74)          | 1.48 (1.29, 1.70)       | <0.001   |
| <b>DUD</b>                    |                  |          |                            |                         |          |
| 1998-2004                     | 12               | 72       | 2.02 (1.29, 3.19)          | 2.32 (1.37, 3.92)       | 0.002    |
| 2005-2009                     | 12               | 122      | 1.48 (0.98, 2.24)          | 1.33 (0.78, 2.27)       | 0.30     |
| 2010-2017                     | 38               | 317      | 2.00 (1.50, 2.66)          | 2.27 (1.56, 3.31)       | <0.001   |

<sup>a</sup>Adjusted for age, birth country, marital status, education, income, and region.

<sup>b</sup>Additionally adjusted for prior history of psychiatric disorders (major depression, anxiety disorder, bipolar disorder, schizophrenia, AUD, DUD) at index date.

AUD = alcohol use disorder, CI = confidence interval, DUD = drug use disorders, HR = hazard ratio, PC = prostate cancer
